# Supplementary figures and images for: Helminth Protein Vaccine Induced Follicular T Helper Cell for Enhancement of Humoral Immunity againstSchistosoma japonicum
Source: Hindawi journal article supplement (doi:10.1155/2013/798164), 2013-01-01

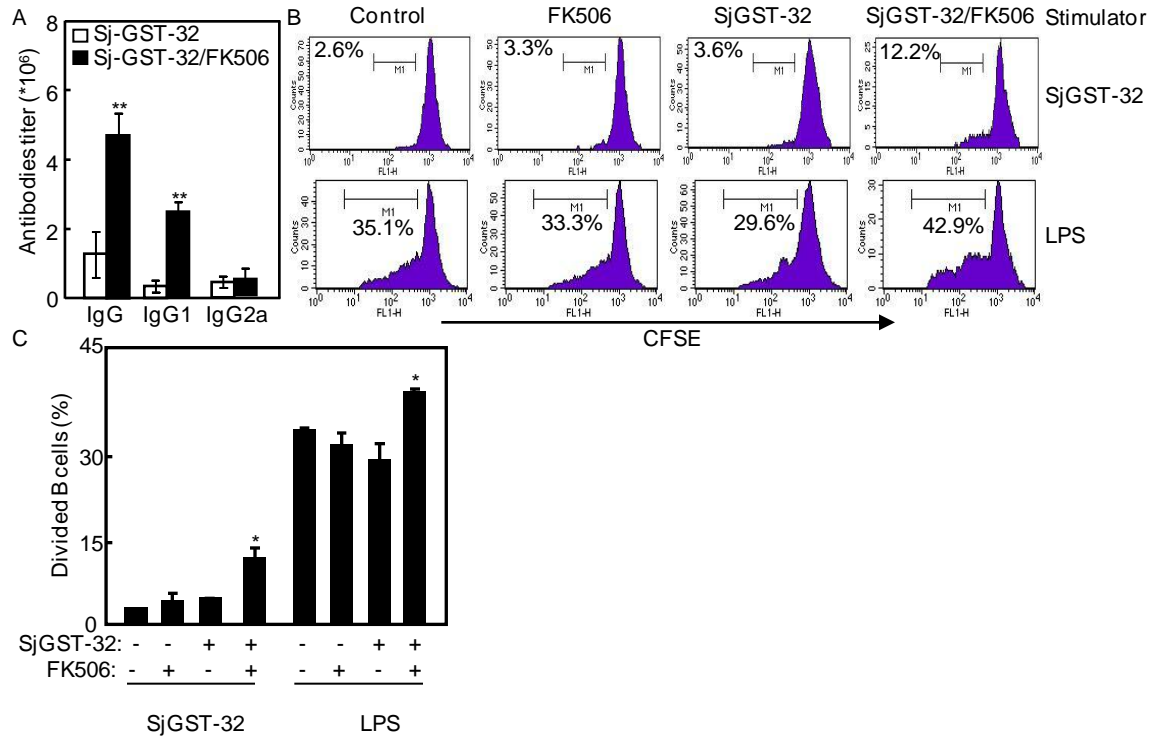

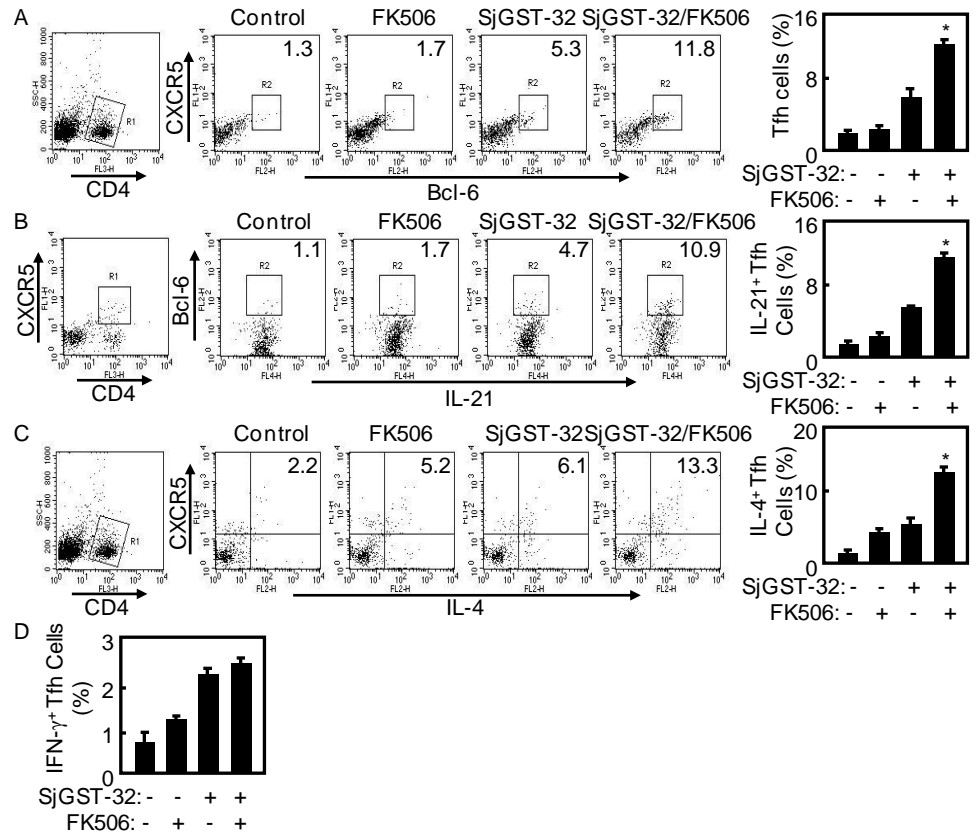

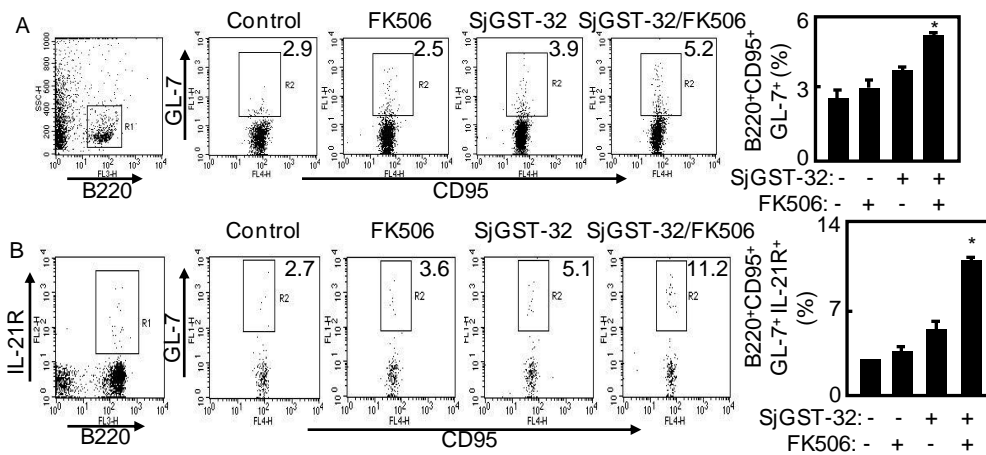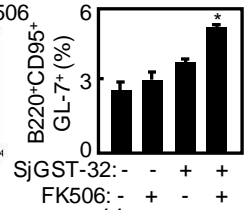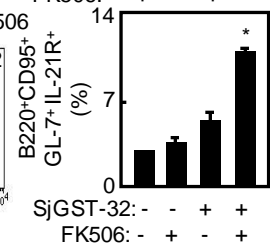

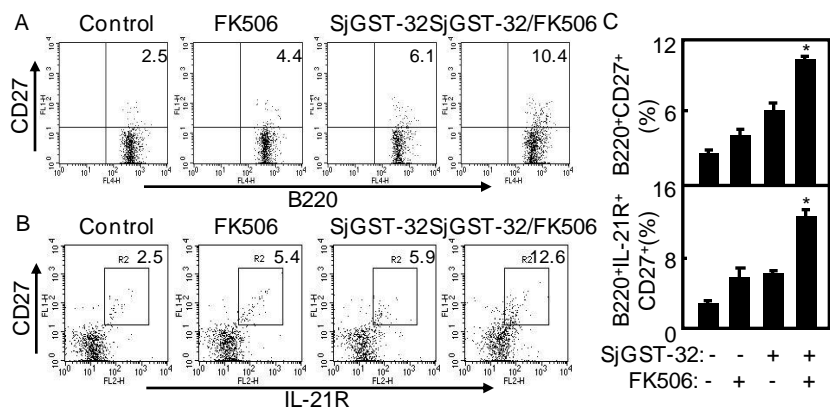

Supplement: f1 [file 798164.f1.pdf]
